1 **Full title**

2 **Managing Low Back Pain in Rural Uganda: A Qualitative Study Exploring the Perspectives and**  
3 **Practices of Frontline Health Workers regarding LBP Management in Primary Care.**

4 **Short title**

5 **Low-Back Pain Management in Rural Uganda**

6 **Authors : Paul Harscouët<sup>1\*</sup>, Gloria Ndekezi Chimpaye<sup>2</sup>, Herman Kazibwe<sup>2</sup>, Jerome Kabakeynga<sup>2</sup>,**  
7 **Denise O’Callaghan<sup>1</sup>, Catherine Blake<sup>1</sup>, Brian Caulfield<sup>1</sup>, Cliona O’Sullivan<sup>1</sup>.**

8 <sup>1</sup>: **School of Public Health, Physiotherapy and Sports Science, University College Dublin.**

9 <sup>2</sup>: **Faculty of Medicine, Mbarara University of Science and Technology.**

10 **\*: Corresponding Author.**

**NOTE: This preprint reports new research that has not been certified by peer review and should not be used to guide clinical practice.**

## 11 Abstract

12 BACKGROUND AND AIMS: Low-back pain (LBP) is the main cause of years lived with disabilities (YLDs)  
13 worldwide and the second cause of YLDs in Uganda. In 2019, it was responsible for 7.4% of global YLDs  
14 and 5% of YLDs in Uganda. LBP takes a significant toll on people's quality of life and disproportionately  
15 affects lower socioeconomic classes, elders, and women. In rural Uganda, LBP is managed in health  
16 centres by clinical officers and nurses with limited resources. This study aims to understand the  
17 perspectives and practices of these health workers.

18 Method: A qualitative design using semi-structured focus-group discussions was employed. Purposive  
19 sampling allowed us to identify relevant participants based on their roles as healthcare professionals  
20 working in primary care context in rural South-West Uganda. Data was analysed using thematic  
21 analysis.

22 Findings: LBP is a common and persistent complaint among patients presenting to rural health centres  
23 in Uganda. Manual labour and female specific health conditions were deemed to be common causes.  
24 There was a strong reliance on medication prescription, coupled with X-ray diagnosis, with little  
25 emphasis on education or exercise. Finally, findings highlighted major barriers for patients within the  
26 referral system to hospital care or rehabilitation.

27 Discussion: Education and training of frontline clinicians in terms of appropriate prescribing and  
28 rehabilitation for LBP is crucial. Evidence-based rehabilitation interventions need to be developed and  
29 adapted so that they can be delivered within the time and resource constraints of the health  
30 workforce, ensuring that they are acceptable and effective to patients in the context of rural Uganda.

31

## 32 Introduction

33 Low-back pain (LBP) is the main cause of years lived with disabilities (YLDs) worldwide and the second  
34 cause of YLDs in Uganda [1-2]. It affected an estimated 619 million persons globally in 2020 and in  
35 2020, it was responsible for 7.7% of global YLDs and 5% of YLDs in Uganda [2-3]. It is a debilitating  
36 condition with a lifetime prevalence of 84% and a chronic form prevalence of 23% [4]. The prevalence  
37 of LBP is higher in high-income countries but the demographic projections of low- and middle-income  
38 countries, (LMICs) such as increased life expectancy and ageing, will be consequential to the rise of  
39 LBP prevalence [2, 4]. In Uganda, the prevalence of back pain among older persons is estimated to be  
40 64.7% with women being significantly more affected than men [5]. Low-back pain has a socio-  
41 economic gradient, with lower socioeconomic status being associated with a higher prevalence [6, 7].

42 Chronic LBP takes a significant toll on people, affecting “various domains of daily life from basic self-  
43 care activities to advanced and complex social interactions, work and leisure activities and eventually  
44 leading to poor quality of life” [6]. A review of qualitative studies investigating the impact of LBP on  
45 people’s lives described the consequences of LBP as “extending beyond functional considerations, and  
46 pervading many aspects of patients’ lives” [8]. They summarized the impact of LBP under five main  
47 themes: activities, relationships, work, stigma, and changing outlook [8]. However, most of these  
48 studies were conducted in high-income countries (40/42). Older persons tend to have greater  
49 disability resulting from LBP than younger people [9]. In urban Uganda, LBP is associated with a loss  
50 of working days and a reduction in the overall quality of life [10]. Despite the growing burden of  
51 musculoskeletal impairment, musculoskeletal health tends to be under-prioritised in LMICs’ non-  
52 communicable health policies [11].

53 LBP usually has no known pathoanatomical cause, often referred to as non-specific low back pain [9],  
54 however it can be the symptom of a severe pathology, such as spinal fracture, infection, malignancy,  
55 cauda equina syndrome, or radiculopathy [9, 12]. A study conducted in an orthopaedic clinic in urban

56 Uganda among patients seeking LBP care as chief complaint found that 19.1% had nerve root  
57 compression and 17.2% of patients had a serious spinal pathology [13]. The frequency of serious spinal  
58 pathology in this study was higher than the 1% to 10% frequency reported in high-income contexts  
59 [9].

60 In Uganda, firstline care for patients with LBP in rural areas is delivered in health centres III and IV by  
61 clinical officers or nurses. Health centres III are found at the sub-county level and cover a population  
62 pool of 20 000 people. Health centres IV are found at the county level and cover a population pool of  
63 100 000 people. If a serious pathology is detected, patients are then either managed locally for certain  
64 health conditions (e.g. brucellosis, extra-pulmonary TB) or referred to a hospital if more specialist care  
65 and investigation is warranted (e.g. risk of cancer). LBP management is not specifically addressed in  
66 the Uganda Clinical Guidelines where the only reference to LBP as a condition can be found under the  
67 domain of palliative care [14].

68 Rehabilitation, in the form of advice, education and exercise, is considered firstline care for non-  
69 specific LBP [15]. In Uganda, there is a severe rehabilitation workforce scarcity [16]. This scarcity is  
70 most important in rural areas where rehabilitation services are practically non-existent and the  
71 referral system faces many challenges, making these services inaccessible to rural populations. As a  
72 human right, rehabilitation is particularly important for people with disabilities, including those with  
73 LBP.

74 This study was undertaken as part of a larger project, called the BACKTRACK project, which aimed to  
75 develop technology-enabled care pathways, as a solution to improve LBP management in rural  
76 communities in Uganda. Specifically, this study sought to understand the perceptions and practices  
77 relating to LBP of primary care clinicians working in rural areas . It follows the Human Rights Council  
78 call to “increase rehabilitation-related research, especially in priority areas identified by WHO [World  
79 Health Organization], such as the types and impacts of different service delivery models, [...] and  
80 facilitators and barriers to accessing rehabilitation” [17].

## 81 Methods

### 82 *Context and approach:*

83 The BACKTRACK research project is co-led by researchers from Mbarara University of Science and  
84 Technology (MUST), Uganda and University College Dublin (UCD), Ireland. Our methodology reporting  
85 follows the COREQ guidelines for qualitative studies report [18].

### 86 *Study design*

87 A phenomenological approach using qualitative design in the form of focus-group discussion was used  
88 to explore the practice of low-back pain management by healthcare workers in rural South West  
89 Uganda. Focus group discussion was deemed an appropriate method to facilitate deeper discussion,  
90 shared understandings and diverse viewpoints from clinicians working in different health centres, and  
91 enabled the research team to collect a broad range of views within a short time-frame.

### 92 *Participant recruitment*

93 Ten health centres (levels III and IV) were randomly selected from a list of health centres that refer  
94 their patients to Mbarara Regional Referral Hospital (MRRH). Permission to recruit participants was  
95 granted by the relevant district health officers for the participating health centres.

96 Purposive sampling allowed us to identify relevant participants based on their roles as healthcare  
97 professionals working in primary care context in rural South-West Uganda, ensuring where possible  
98 there was a nurse and clinical officers was included from each participating health centre. All  
99 participants received an invitation to participate from MUST. Participants came from three different  
100 districts: Mbarara, Rwampara and Isingiro and worked at HC III and IV level. Every person contacted  
101 agreed to participate.

### 102 *Focus Groups*

103 Three FGDs were conducted and facilitated separately by three researchers (COS, GNC, PH) in Mbarara  
104 in October 2022. The question set used to guide the FGDs was developed in advance, during several  
105 meetings with researchers and clinicians from the two universities involved in the BACKTRACK project  
106 and guided by the overall study aim. Prior to the focus groups, participants had read the participant  
107 information leaflet and signed a consent form. At the beginning of the FGD, the facilitators introduced  
108 themselves and reiterated the aim of the BACKTRACK project and the purpose of the focus groups.  
109 The focus group discussion was semi- structured, with the question set used as a prompt to initiate  
110 and guide the discussion. Participants were encouraged to discuss freely and openly. All FGDs were  
111 conducted in English, audio-recorded and lasted sixty to seventy-five minutes. No field notes were  
112 made. Transcripts were not returned to participants for comment nor correction.

### 113 *Data Analysis*

114 We conducted a thematic analysis of the transcripts [19-21]. The data generated provided a rich  
115 description of perceptions and experiences, which facilitated the use of an inductive and constructivist  
116 approach at a latent level to facilitate identification of themes. Providing a rich description means that  
117 the “themes identified and developed here are an accurate reflection of the data set” instead of  
118 focusing on a particular aspect of it [19]. The inductive approach implies that the themes identified  
119 are strongly linked to the data itself, instead of being theory-driven. Analysing at the latent level goes  
120 beyond the semantic level to “identify or examine the underlying ideas, assumptions, and  
121 conceptualizations -and ideologies- that are theorised as shaping or informing the semantic content  
122 of the data” [19]. The positionality of the three researchers, who conducted the FGDs and the data  
123 analysis, as physiotherapists with experience of managing LBP, (GN, PH, COS) and with a deep  
124 understanding of the Ugandan health system and context (GN) allowed analysis at a latent level.

125 Finally, a constructivist approach considers that “meaning and experience are socially produced and  
126 reproduced, rather than inheriting within individuals”. Three researchers, (GN, PH, COS) read and re-  
127 read the transcripts of the focus groups that they had facilitated (familiarisation, Step 1). Each

128 researcher undertook line by line coding of their own focus-group discussion transcripts, (Step 2). The  
129 codes generated and corresponding quotes were recorded manually on Microsoft Excel and  
130 preliminary categories of data were identified by each researcher, (generation of themes, Step 3).  
131 Then, during two consensus meetings, preliminary themes were reviewed (Step 4) and agreement was  
132 reached on the meaning and naming of themes (Step 5). During the final phase, (write-up), codes and  
133 quotations were revisited to extract quotations to highlight the meaning of themes.

#### 134 *Ethical approval*

135 This study received ethical approval from the Mbarara University of Science and Technology Research  
136 Ethics Committee (MUST-2022-540) and from the Human Research Ethics Committee at University  
137 College Dublin (LS-LR-22-227-OSullivan).

## 138 Results

139 The demographics of the participants can be found in table 1 below.

---

|                           |                             |                         |
|---------------------------|-----------------------------|-------------------------|
| <b>Occupation</b>         | Clinical Officer (n=8)      | Registered Nurse (n=11) |
| <b>Gender</b>             | Female (n=13)               | Male (n=6)              |
| <b>Health Centre (HC)</b> | Health Centre 4 (n=8)       | Health Centre 3 (n=11)  |
| <b>Age (years)</b>        | $\mu=35.5$ ( $\sigma=6.4$ ) | Min=29; Max=50          |

140 Table 1 – Participant’s Demographic Characteristics.

141 Five major themes were identified, some with sub-themes that interconnected and overlapped with  
142 other themes (Fig 1). The major themes were: (1) The burden of LBP, (2) Common aetiologies and  
143 causes, (3) Management of LBP, (4) Patient expectations, and (5) Challenges with referral pathways.

144 **Figure 1 - Themes used for thematic analysis.**

## 145 The burden of LBP

146 Low-Back-Pain (LBP) is a common condition among patients attending health centres in rural Uganda,  
147 although not always as the primary reason for attending or coexisting with other disorders:

148 *“It's a big problem in my setting because on a daily [basis] if you are attending to 60 clients, about 15*  
149 *of them will present with this problem”*

150 *“Many patients, about 70% of our patients, come complaining of other symptoms. Of course in most*  
151 *cases they bring in the back ache but not as a prime symptom”.*

152 For instance, LBP was a common symptom among women presenting with Pelvic Inflammatory  
153 Diseases (PIDs):

154 *“So most of them women of the reproductive age have those afflictions [PID]. So they present with*  
155 *back pain.”*

156 LBP has an important gender dimension; some participants reported that women are over-  
157 represented among patients consulting for LBP, due to coexisting gynaecological disorders or  
158 perceived differences in health seeking behaviour, while LBP was seen as *“common in men because of*  
159 *their method of work.”*

160 *‘Low back pain is a serious problem, especially in the women compared to men’*



161 *‘And it’s more common in women than men. I don’t know whether because men don’t seek*  
162 *healthcare so often’*

163 Chronic LBP was perceived as a common complaint among older people, with patients attending  
164 frequently and repeatedly for care:

165 *“The elders come back every month complaining of their back.”*

166 *“In my experience the patients we see, you find that they are too old. You get one old mukade (old*  
167 *woman) comes with low back pain. She will tell you medical documents to show the history. She will*  
168 *tell you I have tried this and that and nothing has helped. You see that she is still in pain.”*

169 Back pain was perceived by HCWs to be a ‘serious problem’, in terms of its high prevalence, health  
170 seeking behaviour, potentially severe underlying causes and severity of presentations.

171 *“Backache is a serious problem. Every day I meet such cases whether at my place of work. Even*  
172 *outside this room when I meet someone and they learn, oh, you’re a ‘musawo’ (health worker), I*  
173 *have this problem”*

174

## 175 Common aetiologies and causes

176 Several causes or risk/contributing factors for LBP were proposed including age, trauma, disease,  
177 obstetric and gynaecological issues, sedentary lifestyle, occupation or farming related factors and  
178 lastly, patient factors.

179 **Working conditions and occupational hazards** are perceived as a major source of LBP. The impact of  
180 excessive manual labour and resultant mechanical stress on the spine affects workers, especially  
181 subsistence farmers:

182 *“They bend too many times”*

183 *“Also maybe we can add people who carry heavy load. The heavy lifters it could also affect them”*

184 Female work roles within the household and for income generation were perceived to contribute to  
185 low back pain:

186 *“Most common group who get lower back pain are women because of the nature of their work,*  
187 *especially being a peasant, at the same time, plus the housework. You find most of the time the*  
188 *woman is the like the soul of the family to to prepare or, to dig for the home. So most of the time*  
189 *they are the ones who come complaining about back pain, maybe like 3 out of 7 I would say are*  
190 *women. And they are more severe, especially when they have then the season maybe of planting or*  
191 *just, normally that’s when they have such a complaint”*

192 **Age and sedentary time** intersected as contributing factors to LBP, such as office or healthcare  
193 workers with sedentary occupations or elders with low levels of physical activity:

194 *“Physical inactivity. People who sit a long time, especially the elders, that can dispose them to LBP”.*

195 *“Also posture. Also some people like as you see more than a hundred patients a day and we see*  
196 *ourselves sitting since morning until lunch time. That one also affects your back”*

197 **Injuries** as a result of falls or violence were deemed a source of low back pain:

198 *“Then I also think of other cause of low back pain: Injuries. Injuries to the spine after accident,*  
199 *sliding”*

200 *“There are a number of causes; infection, trauma, accidents. Some have been assaulted and beaten,*  
201 *some chronic diseases like diabetes, TB, then PIDs [pelvic inflammatory disorders]- they all cause*  
202 *back pain.”*

203 As quoted above, participants reported a wide range of **non-musculoskeletal conditions** which  
204 manifest as LBP presentations, including serious pathologies such as extra-pulmonary tuberculosis or  
205 cancers, and other common benign pathologies, such as pelvic inflammatory diseases.

206 *“People they come and they and have PIDs [pelvic inflammatory disorders], inflammatory infections,*  
207 *TB infection, TB of the spine, malignancies, cancers’*

208 Pelvic inflammatory disorders were perceived to be a common contributor to low back pain as well as  
209 other **female specific health conditions** such as pregnancy related low back pain and post caesarean  
210 section.

211 *“To add on my what my colleagues are saying, about 10 mothers who deliver by caesarian section,*  
212 *most of them come with low back ache. And now most of them are saying maybe they should give us*  
213 *general anaesthesia instead and it is true and it is very common. We as health workers do not know*  
214 *what causes that. After like two years of delivering by caesarian they come back with low back pain.*  
215 *Of course we give them analgesia like Indocid, Diclofenac injection but it does not get cured*  
216 *completely. It keeps coming back and they keep complaining. Yeah”*

217 **Patient factors** such as poor knowledge and awareness were considered to be risk factors for LBP:

218 *“Also think that people lack information on low back pain, how to prevent these thing from*  
219 *happening. In the end they end up doing the wrong thing because they do not have information*  
220 *about what is back pain, how, how it is prevented”*

221 Patients were reported to have **strong beliefs** about the underlying cause of their LBP, some of which  
222 echoed that of health workers in terms of work, age and pregnancy-related low back pain:

223 *“There is another one that the community relate back pain to old age because whenever a person*  
224 *complain of back pain they will just say “ hey you’re grand old” so some things that come*  
225 *automatically”*

226 *“And maybe some of them think the nature of work, for them they're heavy lifting every day they*  
227 *think you have to have back problem.”*

228 Participants reported that female patients attributed their back pain to labour and childbirth or  
229 menopause:

230 *“Surgeries especially for women who have had caesarean section. Many attribute the back ache to*  
231 *the spinal injection.”*

232 *“Others will say you see because of my age I no longer menstruate and because of that it is*  
233 *disturbing my back. They think it is menopause that is the problem. They may go as far as thinking*  
234 *that maybe if they could bleed, they may get relief in the back”*

235 Sexual intercourse was also perceived among patients to contribute to back pain

236 *“There is also another misconception in the community especially men when they take long without*  
237 *having sexual intercourse, it can also cause low back pain”*

238 *“Some attribute it to family planning in the case of women, others attribute it to old age, hard work,*  
239 *others attribute it to; especially among the couples, people attribute it to a lack of sexual exercises,*  
240 *and women may say I am too young but my husband is too busy and is not working on me. Backache*  
241 *is a serious problem.”*

## 242 Management of LBP

243 There is a significant variability in the management practices among clinicians, with an overarching  
244 and predominant focus on pain management strategies and onward referral for investigations,  
245 usually X-Ray.

246 Pain management strategies varied among participants and included combinations of medicinal and  
247 non-medicinal strategies. The medicinal options encompassed common drugs and some medicines  
248 not usually indicated in LBP management:

249 *“Ibuprofen, paracetamol, diclofenac,..... Sometimes you can add the vitamins, the B complex.....And*  
250 *also sometimes muscle relaxants.”*

251 *“Managing pain you have to take the history of the patient. So you have to know the type of work*  
252 *the patients does. Is it a man? Is it in the middle age? Depending on the work you may advise to*  
253 *reduce the work and will give some painkillers”*

254 Non medicinal pain management strategies included general advice to reduce work and  
255 recommendations for warm compresses or massage, although participants perceiving these  
256 interventions to be ineffective:

257 *“Then for the elderly especially we normally encourage them to do warm compress but they say now*  
258 *at home no one is there, my husband is too busy and not around and is no longer interested”*

259 *“Others have been advised to go for massage, others have been advised to exercise, and still they*  
260 *would come with some little progress.”*

261 Exercise as part of LBP management was rarely mentioned, with a clear need for further education  
262 and training for clinicians in terms of prescription of appropriate exercise and advice relating to  
263 physical activity and occupation.

264 *“To add to what he has said on referral, when you tell a patient to do exercises, somehow, they be*  
265 *thinking; I am digging and working and so they have the idea that exercises that make you sweat are*  
266 *the actual exercises. I think it would be good for us to gain knowledge on what exact exercises we*  
267 *can teach our patients to relieve their back pain.”*

## 268 Patients beliefs and expectations

269 Patients' expectations and beliefs strongly influenced how LBP is managed in HCs, with some patients  
270 having strong preferences for specific treatments, particularly medicines, to eradicate their pain:

271 *“Most patients actually know the effects of pain killers. For some of our patients, they have taken so*  
272 *many pain killers and when you try to tell them that we should not use drugs, they lose hope and say:*  
273 *“Hati emibazi yona obu nagikozesa ekahwaho (since I have used all the drugs and exhausted them),*  
274 *it means I am going to die”. So they reach an extent of thinking that now the back pain is going to*  
275 *end their life”*

276 *“Sometimes when they have experienced pain for a long time, they also have relatives who have*  
277 *suffered from back pain and they share advice. So they ask for injections and also they ask for*  
278 *calcium tablets because they associate it with strengthening bones”*

279 Patients, desperate for pain relief, may self-medicate, procuring medicines from outside of the health  
280 system:

281 *“It (low back pain) is common and it is a burden. Most of these people which come have had some*  
282 *self medication. In fact, we used to have injections from Tanzania they call Dismas. In the old days*  
283 *Dismas was a very good analgesic given intramuscularly. But in most cases, they go for that.”*

284 Indeed, LBP is rarely perceived as a complex condition by patients and they have strong expectations  
285 that their pain would be quickly resolved:

286 *“People expect that when they come you treat them and pain goes as fast as possible. When you tell*  
287 *them it is chronic they don't understand, they think they should be treated”.*

288 Advice and exercises alone for LBP was perceived to be unacceptable to patients who may assume  
289 that nothing has been done for them and are desperate for fast pain relief to return to manual labour:

290 *“When you give them advice they will assume you have not helped enough.”*

291 *“Patients expect to get drugs. Even if you speak and speak, explain everything and give advice, they*  
292 *feel you have done nothing if they don’t go home with drugs before they can leave the facility.”*

293 *“Most of them, they are expecting pain relievers.... especially someone who's doing work digging. So*  
294 *when you tell her back needs exercise she would think the worst thing..So she wants. She's ever*  
295 *taking painkillers, so now she has come to get [them].”*

## 296 Referral Challenges

297 Onward referral for investigations, usually X-rays, was a dominant theme, in terms of features of  
298 patient management and challenges associated with referral pathways. Some clinicians advise  
299 patients to pursue x-ray imaging as a first line response, depending on household financial capacity  
300 and intergenerational solidarity; for instance “those especially whose grandchildren can afford”.

301 *“So when the patients tells you about back pain you good deep, and ask about maybe, as we had*  
302 *seen if this is maybe an infection? Or fracture of structure or any other cause, then, when you rule*  
303 *out some of the causes, then now you can, if you can now it's really sent for X-ray”*

304 There is an important loss to follow-up when patients are referred to upper-level facilities, as  
305 described by a participant:

306 *“Like 10, you may send like 3, and probably one would manage to go because of the referral system*  
307 *for the x ray”.*

308 An important challenge is the lack of financial resources associated with travel from rural to urban  
309 area where referral services are located:

310 *“Patients usually go back to the community and they don’t continue on services for reasons such as*  
311 *financing and all that. And then after a certain period you see them coming back to you and they*  
312 *want you to help them.”*

313 When seeking care at Mbarara Regional Referral Hospital (MRRH), expected long waiting times onsite  
314 constitutes a significant barrier. Clinicians reported stories whereby some people *“would go there and*  
315 *see that they sit for good hours and if you’re not patient you’d go back home”*. This repeated  
316 phenomenon acts as a deterrent to seek care and reveals the need for key workers to accept referrals.  
317 A participant illustrated the problem:

318 *“So now the problem is the referral system, because if I’m a health worker, and I referred this*  
319 *patient if possible, if I’m able to connect to someone I’m referring to. This patient gives*  
320 *confidence that when she goes there she’ll be worked on because most of them fear coming*  
321 *here the whole day, she sits and she don’t receive treatment and at the end of the day she was*  
322 *back.”*

323 Physiotherapy services are found exclusively in Mbarara, and the low numbers of physiotherapists  
324 means that it is difficult and expensive to access and in scarce quantities. Accessing these services are  
325 costly for patients who may need to travel several times to attend multiple rehabilitation sessions.  
326 These constraints paired with the uncertainty of being attended to creates dissatisfaction and refusal  
327 to seek care. Older people are particularly at risk: *“They are in the old age and they don’t have things*  
328 *like finance and transport to support them”*.

329 Because physiotherapy services are underdeveloped, both clinicians and patients are often unaware  
330 of the existence and/or the scope of what these services have to offer for LBP, thus nullifying the  
331 appropriate referral possibilities:

332 *“Yes, maybe I would say sometimes I’ve been referring these patients, but not specifically to the*  
333 *physios sometimes we say for physician to review for the surgeon”*.



334 Several participants disregard what rehabilitation services could offer to patients with LBP. The  
335 following quote illustrates how LBP is commonly approached only with a biomedical lens:

336 *“personally, I never regarded physio as a way of managing LBP. I Also use it to look at a line*  
337 *dimension X ray and maybe surgery. But now it’s good that we know physio can be a treatment”.*

338 One participant advocated for a decentralisation of rehabilitation services to the communities to  
339 overcome the multiple referral challenges:

340 *“To me all these services should be expanded to all the HCs because it’s where we get these patients,*  
341 *most of them don’t know that they can benefit from physiotherapy”.*

342

## 343 Discussion

344 This study sought to understand the experiences, perceptions and practices of frontline health care  
345 workers in rural health centres in Uganda in relation to LBP management. Findings demonstrate that  
346 LBP is a common and persistent complaint among patients attending rural health centres, with severe  
347 impacts on lives and livelihoods. Despite this, LBP and musculoskeletal disorders are not a priority for  
348 health service delivery and planning, despite a renewed focus on non-communicable disease and  
349 injuries in the Ministry of Health National Health Strategy [22].

350

351 Physical work was deemed to be a root cause of LBP, and in turn, LBP had devastating impacts on  
352 people’s livelihoods, with women severely impacted. The need for clinicians to provide ‘quick’ working  
353 solutions was deemed critical to enable people to return to work and social roles. There was a  
354 perception that evidence based strategies such as exercise and advice may not be tolerated or even  
355 appropriate for an already highly active population. Evidence based LBP management is derived from  
356 research from HICs, and therefore tuned to populations who are in the main sedentary- This is in stark

357 contrast to people living in rural Uganda, where, as evidenced in our study and others [23] people  
358 living in rural communities are highly active due to the manual nature of their occupations. There is  
359 therefore an urgent need to develop and adapt evidence based interventions for LBP that are  
360 appropriate to the population and context in rural Uganda and crucially, deep consideration of how  
361 these interventions can be implemented, mainstreamed and delivered in rural health centres within  
362 the resources and time available, to be effective.

363

364 Currently, front-line clinicians are ill-equipped to manage LBP in Uganda. Readily accessible  
365 management options are limited to basic drugs and investigations such as Xray and blood tests. These  
366 strategies are free to patients in the public hospital system but are subject to long waiting times.  
367 Furthermore, these strategies (over reliance on medication and referral for X-ray) are at odds with  
368 evidence based practice for non-specific LBP.

369 Essentially, the management of LBP can be summarised as mainly transactional and passive (i.e.  
370 treatment is limited to the consultation interaction, with little capacity to empower patients to self  
371 manage), highlighting a dominant medical model of LBP care, strongly contrasting with evidence based  
372 biopsychosocial approaches [15]. Strong dependence on medication was evident both from how  
373 participants report their management strategies and their perceptions of patient expectations. In the  
374 absence of available and affordable alternatives, such as education and rehabilitation, health workers  
375 tend to prescribe a large amount and diversity of medication, as observed in other LMIC contexts [24].

376 A study investigating antibiotics use in rural eastern Uganda found that for patients presenting with  
377 back pain, “antibiotics were often prescribed in addition to painkillers to treat possible infections”  
378 [25]. The routine prescription of antibiotics for pain was perceived to enable return to physical work,  
379 despite health workers and patients' concern about harmful side-effects. This study also found that  
380 local residents frequently stock-piled medicines at home, including previously prescribed antibiotics,  
381 which were commonly used to self-manage pain. The researchers discuss how prescription, delivery,

382 storage and use of medications such as painkillers are intricately linked to the socio-economic  
383 constraints within which people live and their expectations when seeking care, [25, 26].

384

385 Patients' dependence on painkillers was evident in our findings from both their reported efforts to  
386 secure medications, even from outside of the country and their dissatisfaction if medication was not  
387 prescribed. Painkillers usage is frequent in Uganda and opioids drugs “such as morphine, tramadol  
388 and pethidine, are easily available to the Ugandan public.” [27]. This availability accentuates the  
389 “growing global problem of controlled prescription drugs use disorders” which is aggravated by “.low  
390 compliance to regulations on CPDs among private pharmacies in Uganda” [28]. Despite the  
391 widespread availability and misuse of opioids such as tramadol, the policy context and oversight has  
392 been described as incoherent, thus creating “a tautological problem in education” amongst healthcare  
393 professionals [27], further worsening the problem of inappropriate prescribing.

394 X-ray referral was a common diagnosis strategy, although at odds with EBP guidelines, whereby  
395 unnecessary radiology is deemed harmful and may contribute to increasing fear avoidance patterns  
396 and pain related psychological distress, further increasing the risk of persistent pain and LBP related  
397 disability [29]. Furthermore, unnecessary referral to Regional Referral Hospital for x-ray places a  
398 considerable financial burden on patients in terms of direct out of pocket health care expenses and  
399 travel costs and on the health system, in terms of wasting valuable radiology resources.

400 Even when referral to specialist services for further investigation is essential (e.g. suspected underlying  
401 serious pathology) or treatment is appropriate, clinicians highlighted the access challenges for  
402 patients. MRI or CT investigation is extremely costly in Uganda (e.g. approximately 7- 12% of the  
403 average annual income) and constitutes an out of pocket expense for patients [30]. This lack of  
404 financial capacity coupled with transport and accommodation expenses and the difficulty for patients  
405 to navigate the healthcare system when referred were pointed out as key challenges. Lack of  
406 rehabilitation workers paired with flawed health referral information systems constituted two

407 structural challenges for efficient management when patients reached the referral hospital. These  
408 results reflect findings from Sharma and colleagues, investigating LBP management practices in 32  
409 LMICs [24].

410 The findings from this study underline the urgent need for enhanced education and training for  
411 frontline clinicians to manage LBP through enhanced and appropriate prescribing and adoption of  
412 basic rehabilitation skills.

413 Education and training of health professionals for pain management at all health system levels is  
414 crucial to ensure appropriate and safe prescribing. Training should include therapeutic counselling  
415 with patients with persistent pain to empower patients to manage pain and prevent medication  
416 abuse. However, any efforts focusing solely on healthcare professionals will have very limited impact  
417 if it does not take into account the perspectives and motivations of prescribers and patients and the  
418 socio-economic context within which these practices are embedded. Rigorous investigation is  
419 required to understand and address the structural components influencing pain medicine prescription  
420 and consumption to avoid falling into an individualist behaviour change approach to a profoundly  
421 social issue [31].

422 Evidence-based and context-specific rehabilitation interventions need to be developed and adapted  
423 so that they can be delivered within the time and resource constraints of the health workforce and to  
424 ensure that rehabilitation interventions are relevant and acceptable to patients in the context of rural  
425 Uganda. Such interventions need to be co-designed and tested in this context, to ensure that they are  
426 feasible for uptake and implementation but also tailored to meet people 's needs so that they are  
427 effective. In the long term, the rehabilitation workforce should be enlarged and rehabilitation services  
428 mainstreamed into primary health care at the community level.

429 To our knowledge, this is the first study to focus on LBP management in rural Uganda. It showed that  
430 determinants of LBP management and outcomes act at the micro-level and the macro-level. At the

431 micro-level, the clinicians' knowledge and the services available at a given facility acted as modulating  
432 factors of LBP management. At the macro-level, the healthcare system's complexity, lack of transport  
433 and the high costs associated with healthcare access paired with health workforce shortages and poor  
434 health information system were identified as major determinants of the care pathway.

435  
436 The restricted geographical diversity of this study creates a limit to our ability to generalise the  
437 understanding of the contextual determinants. The fact that interviewers were physiotherapists may  
438 have biased participants who may have felt obliged to mention rehabilitation more than they normally  
439 would. Furthermore, a workshop conducted to introduce the broader BACKTRACK project prior to the  
440 FGDs may have influenced responses about LBP management.

441  
442 This study provides a strong understanding of the landscape and scale of the LBP problem in rural  
443 Uganda. It has shown the challenges of managing LBP at the intra-facility level and the several inter-  
444 facility referral challenges patients experienced. It can inform innovative solutions aiming to address  
445 the burden of LBP in rural areas. Findings from this study and a concurrent study of LBP patients have  
446 informed the BACKTRACK project in the co-design, development and evaluation of a mHealth clinical  
447 decision support system for LBP. Future research aims to co-create an evidence-based e-learning  
448 programme for HCWs, tuned to the Ugandan context, to enhance knowledge and skills to manage LBP  
449 in the rural setting and develop an implementation plan to support adoption and uptake of the  
450 programme.

451  
452 As the research team was predominantly physiotherapy researchers, at the outset the focus of the  
453 study was related to rehabilitation. Crucially, this study findings have revealed the necessity to  
454 investigate comprehensively how painkillers are supplied, prescribed, delivered and used by clinicians  
455 and patients. Further investigation is required to understand the perspectives of users, pharmacists,  
456 doctors as well as policy-makers and regulators. Finally, there is a need to investigate the perspectives

457 of doctors at referral points about the use of non-pharmacological means to manage back pain, such  
458 as physical rehabilitation, as well as the relative effectiveness of painkillers in the management of  
459 chronic low back pain in the long term.

460

## 461 Acknowledgements

462 The research team would like to express their utmost gratitude to all clinicians involved in the  
463 projects for their time and efforts.

## 464 References:

- 465 1. World Health Organization. (2022). Musculoskeletal conditions. [Online] Available at:  
466 [https://www.who.int/news-room/fact-sheets/detail/musculoskeletal-](https://www.who.int/news-room/fact-sheets/detail/musculoskeletal-conditions#:~:text=Low%20back%20pain%20is%20the,7.4%25%20of%20global%20YLDs)  
467 [conditions#:~:text=Low%20back%20pain%20is%20the,7.4%25%20of%20global%20YLDs](https://www.who.int/news-room/fact-sheets/detail/musculoskeletal-conditions#:~:text=Low%20back%20pain%20is%20the,7.4%25%20of%20global%20YLDs) [Accessed  
468 11 Apr. 2024].
- 469 2. Ferreira ML, De Luca K, Haile LM, Steinmetz JD, Culbreth GT, Cross M, et al. Global, regional, and  
470 national burden of low back pain, 1990–2020, its attributable risk factors, and projections to 2050: a  
471 systematic analysis of the Global Burden of Disease Study 2021. *The Lancet Rheumatology*. juin  
472 2023;5(6):e316-29.
- 473 3. Institute for Health Metrics and Evaluation. Global Burden of Disease Study 2019 (GBD 2019)  
474 Results. [Online] Available at: <https://vizhub.healthdata.org/gbd-results/> [Accessed 11 Apr. 2024].
- 475 4. Balagué F, Mannion AF, Pellisé F, Cedraschi C. Non-specific low back pain. *The Lancet*. feb  
476 2012;379(9814):482-91.

- 477 5. Wang C, Pu R, Ghose B, Tang S. Chronic Musculoskeletal Pain, Self-Reported Health and Quality of  
478 Life among Older Populations in South Africa and Uganda. *IJERPH*. 10 dec 2018;15(12):2806.
- 479 6. Agnus Tom A, Rajkumar E, John R, Joshua George A. Determinants of quality of life in individuals  
480 with chronic low back pain: a systematic review. *Health Psychology and Behavioral Medicine*. 31 déc  
481 2022;10(1):124-44.
- 482 7. Ikeda T, Sugiyama K, Aida J, Tsuboya T, Watabiki N, Kondo K, et al. Socioeconomic inequalities in  
483 low back pain among older people: the JAGES cross-sectional study. *Int J Equity Health*. déc  
484 2019;18(1):15.
- 485 8. Froud R, Patterson S, Eldridge S, Seale C, Pincus T, Rajendran D, et al. A systematic review and meta-  
486 synthesis of the impact of low back pain on people's lives. *BMC Musculoskelet Disord*. déc  
487 2014;15(1):50.
- 488 9. Maher C, Underwood M, Buchbinder R. Non-specific low back pain. *The Lancet*. Feb  
489 2018;389(10070):736-747.
- 490 10. Galukande M, Muwazi S, Mugisa BD. Disability associated with low back pain in Mulago Hospital,  
491 Kampala Uganda. *African Health Sciences*. 2006;6(3).
- 492 11. Briggs A, Jordan JE, Sharma S, Young JJ, Chau J, Foster HE, et al. Context and priorities for health  
493 systems strengthening for pain and disability in low- and middle-income countries: a secondary  
494 qualitative study and content analysis of health policies. *Health Policy and Planning*. 2023; 38:129-149.
- 495 12. Finucane LM, Downie A, Mercer C, Greenhalgh SM, Boissonnault WG, Pool-Goudzwaard AL, et al.  
496 International Framework for Red Flags for Potential Serious Spinal Pathologies. *J Orthop Sports Phys  
497 Ther*. Jul 2020;50(7):350-372.
- 498 13. Galukande M, Muwazi S, Mugisa DB. Aetiology of low back pain in Mulago Hospital, Uganda.  
499 *African Health Sciences*. 2005;5(2).

- 500 14. Ministry of Health. (2016). Uganda Clinical Guidelines. [Online] Available at:  
501 [https://www.prb.org/wp-content/uploads/2018/05/Uganda-Clinical-Guidelines-2016-National-](https://www.prb.org/wp-content/uploads/2018/05/Uganda-Clinical-Guidelines-2016-National-Guidelines-for-Management-of-Common-Conditions.pdf)  
502 [Guidelines-for-Management-of-Common-Conditions.pdf](https://www.prb.org/wp-content/uploads/2018/05/Uganda-Clinical-Guidelines-2016-National-Guidelines-for-Management-of-Common-Conditions.pdf) [Accessed 11 Apr. 2024].
- 503 15. National Institute for Health and Care Excellence. (2020). Low back pain and sciatica in over 16s:  
504 assessment and management. [Online] Available at:  
505 [https://www.nice.org.uk/guidance/ng59/resources/low-back-pain-and-sciatica-in-over-16s-](https://www.nice.org.uk/guidance/ng59/resources/low-back-pain-and-sciatica-in-over-16s-assessment-and-management-pdf-1837521693637)  
506 [assessment-and-management-pdf-1837521693637](https://www.nice.org.uk/guidance/ng59/resources/low-back-pain-and-sciatica-in-over-16s-assessment-and-management-pdf-1837521693637) [Accessed 11 Apr. 2024].
- 507 16. Agho AO, John EB. Occupational therapy and physiotherapy education and workforce in  
508 Anglophone sub-Saharan Africa countries. *Hum Resour Health*. déc 2017;15(1):37.
- 509 17. Human Rights Council. Habilitation and rehabilitation under article 26 of the Convention on the  
510 Rights of Persons with Disabilities. United Nations ; 2019. 17. UN Doc A/HRC/40/32.  
511
- 512 18. Tong A, Sainsbury P, Craig J. Consolidated criteria for reporting qualitative research (COREQ): a 32-  
513 item checklist for interviews and focus groups. *International Journal for Quality in Health Care*. 16 sept  
514 2007;19(6):349-57.
- 515 19. Braun V, Clarke V. One size fits all? What counts as quality practice in (reflexive) thematic analysis?  
516 *Qualitative Research in Psychology*. 3 juill 2021;18(3):328-52.
- 517 20. Braun V, Clarke V. Reflecting on reflexive thematic analysis. *Qualitative Research in Sport, Exercise*  
518 *and Health*. 8 août 2019;11(4):589-97.
- 519 21. Braun V, Clarke V. Using thematic analysis in psychology. *Qualitative Research in Psychology*. janv  
520 2006;3(2):77-101.



- 521 22. Ministry of Health. (2020). MINISTRY OF HEALTH STRATEGIC PLAN. [Online] Available at:  
522 [https://www.health.go.ug/wp-content/uploads/2022/02/MoH-Strategic-Plan-2020\\_25.pdf](https://www.health.go.ug/wp-content/uploads/2022/02/MoH-Strategic-Plan-2020_25.pdf)  
523 [Accessed 11 Apr. 2024].
- 524 23. Uganda Bureau of Statistics. (2021). The National Labour Force Survey 2021 – Main Report.  
525 [Online]. Available at: [https://www.ubos.org/wp-](https://www.ubos.org/wp-content/uploads/publications/11_2022NLFS_2021_main_report.pdf)  
526 [content/uploads/publications/11\\_2022NLFS\\_2021\\_main\\_report.pdf](https://www.ubos.org/wp-content/uploads/publications/11_2022NLFS_2021_main_report.pdf) [Accessed 11 Apr. 2024].
- 527 24. Sharma S, Pathak A, Parker R, Oliveira Pena Costa L, Ghai B, Igwesi-Chidobe C. et al. How low back  
528 pain is managed—a mixed methods study in 32 countries. Part 2 of Low Back Pain in Low-and Middle-  
529 Income Countries Series. *JOSPT*. 2024; 0(0).
- 530 25. Nayiga S, Denyer Willis L, Staedke SG, Chandler CI. Taking Opportunities, Taking Medicines:  
531 Antibiotic Use in Rural Eastern Uganda. *Medical Anthropology*. 19 mai 2022;41(4):418-30.
- 532 26. Denyer Willis L, Chandler C. Quick fix for care, productivity, hygiene and inequality: reframing the  
533 entrenched problem of antibiotic overuse. *BMJ Global Health*. Jul 2019;4(4).
- 534 27. Kaggwa MM, Devine J, Harms S. The opioid crisis fuelled by health systems: how will future  
535 physicians fare? *BJPsych Int*. aug 2023;20(3):58-60.
- 536 28. Kamba PF, Mulangwa J, Kaggwa B, Kitutu FE, Sewankambo NK, Tebasoboke E, *et al*. Compliance of  
537 private pharmacies in Uganda with controlled prescription drugs regulations: a mixed-methods study.  
538 *Subst Abuse Treat Prev Policy*. 2020; 15.
- 539 29. Hall AM, Audrey-Bassler K, Thorne B, Maher CG. Do not routinely offer imaging for uncomplicated  
540 low back pain. *BMJ*. 2021; 372(291).
- 541 30. World Bank. GDP per capita (current US\$) - Uganda, Malawi. [Online]. Available at:  
542 <https://data.worldbank.org/indicator/NY.GDP.PCAP.CD?end=2022&locations=UG-XM&start=1960>  
543 [Accessed 23 Apr. 2024].

- 544 31. Denyer Willis L, Kayendeke M, Chandler CI. The politics of irrationality. *Med Anthropol Q.* dec  
545 2023;37(4):382-95.

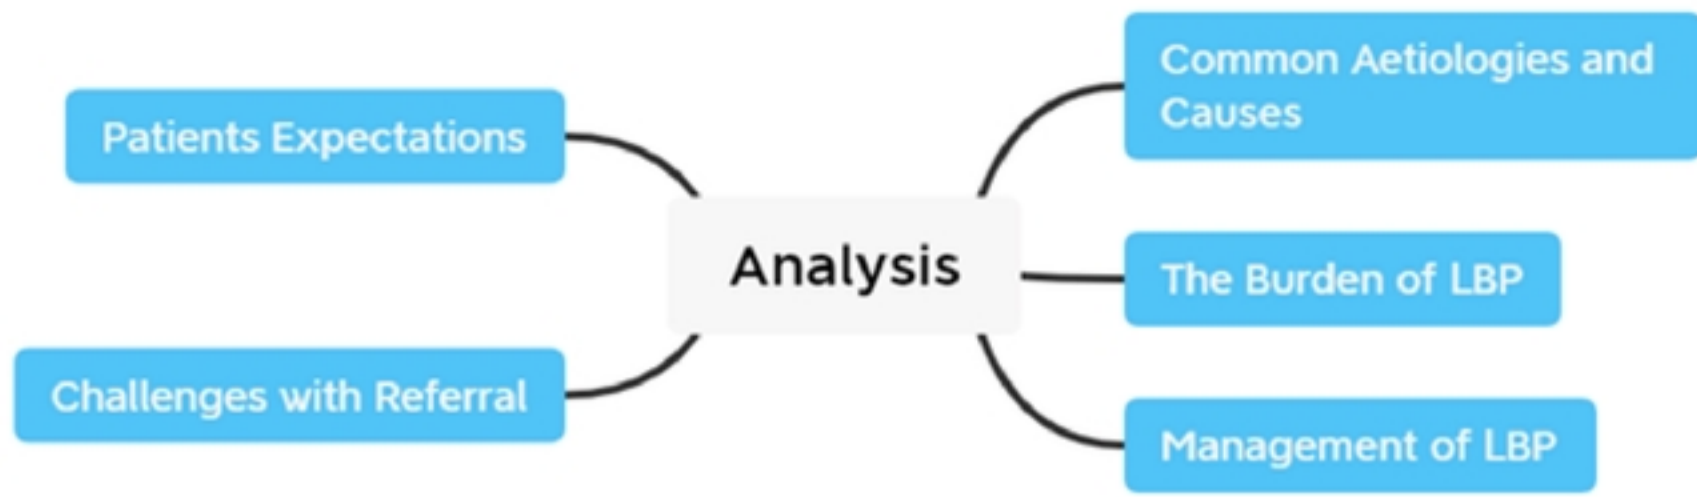

**Figure 1 - Themes used for thematic analysis.**

medRxiv preprint doi: <https://doi.org/10.1101/2024.05.15.24307404>; this version posted May 15, 2024. The copyright holder for this preprint (which was not certified by peer review) is the author/funder, who has granted medRxiv a license to display the preprint in perpetuity. It is made available under a [CC-BY 4.0 International license](https://creativecommons.org/licenses/by/4.0/).
